# Supplementary material for: High susceptibility of Tetranychus merganser (Acari: Tetranychidae), an emergent pest of the tropical crop Carica papaya, towards Metarhizium anisopliae s.l. and Beauveria bassiana strains
Source: PeerJ. 2022 Oct 24;10:e14064. doi: 10.7717/peerj.14064 (PMC9610662; doi:10.7717/peerj.14064)
Supplement: Supplemental Information 1 [file peerj-10-14064-s001.xlsx]

## Sheet: METARHIZIUM
		Values of mortality in screening assay (Metarhzium) (Figure 2)
																																ARC SIN transformation								ANOVA & Tukey analysis
conidia/mL:	100000000
				cumulative mortality		(number of dead adut females)																												dead mites
R: Independent experiments	R1	Day	Control	Ma002	Ma003	Ma004	Ma005	Ma006	Ma007	Ma008	Ma009	Ma014	Ma034																			Treatment	Repetition		% mortality	proportion	square root	arcsen
		3	1	5	3	5	8	3	8	0	0	6	10																			control	1	2	10	0.1	0.316228	0.321751
		4	1	18	5	14	15	12	10	11	0	18	16																			control	2	2	10	0.1	0.316228	0.321751
		5	2	20	10	20	18	14	15	15	9	20	20																			control	3	2	10	0.1	0.316228	0.321751
		6	2	20	17	20	20	15	17	16	15	20	20																			Ma02	1	20	100	1	1	1.5708
		Mortality(%)	10	100	85	100	100	75	85	80	75	100	100																			Ma02	2	20	100	1	1	1.5708
																																Ma02	3	20	100	1	1	1.5708
	R2	Day	Control	Ma002	Ma003	Ma004	Ma005	Ma006	Ma007	Ma008	Ma009	Ma014	Ma034																			Ma03	1	17	85	0.85	0.921954	1.1731
		3	0	9	4	12	7	4	5	5	2	5	9																			Ma03	2	20	100	1	1	1.5708
		4	1	16	14	20	18	12	10	8	9	12	19																			Ma03	3	18	90	0.9	0.948683	1.24905
		5	1	20	18	20	20	14	16	12	15	16	19																			Ma04	1	20	100	1	1	1.5708
		6	2	20	20	20	20	16	16	15	17	20	20																			Ma04	2	20	100	1	1	1.5708
		Mortality(%)	10	100	100	100	100	80	80	75	85	100	100																			Ma04	3	20	100	1	1	1.5708
																																Ma05	1	20	100	1	1	1.5708
	R3	Day	Control	Ma002	Ma003	Ma004	Ma005	Ma006	Ma007	Ma008	Ma009	Ma014	Ma034																			Ma05	2	20	100	1	1	1.5708
		3	1	10	3	4	8	4	6	3	2	7	5																			Ma05	3	20	100	1	1	1.5708
		4	2	17	10	10	18	10	12	8	6	11	11																			Ma06	1	15	75	0.75	0.866025	1.0472
		5	2	20	12	14	18	14	16	15	12	14	19																			Ma06	2	16	80	0.8	0.894427	1.10715
		6	2	20	18	20	20	16	17	17	13	20	20																			Ma06	3	16	80	0.8	0.894427	1.10715
		Mortality(%)	10	100	90	100	100	80	85	85	65	100	100																			Ma07	1	17	85	0.85	0.921954	1.1731
																																Ma07	2	16	80	0.8	0.894427	1.10715
																																Ma07	3	17	85	0.85	0.921954	1.1731
			MORTALITY (%)																													Ma08	1	16	80	0.8	0.894427	1.10715
			Control	Ma002	Ma003	Ma004	Ma005	Ma006	Ma007	Ma008	Ma009	Ma014	Ma034																			Ma08	2	15	75	0.75	0.866025	1.0472
		R1	10	100	85	100	100	75	85	80	75	100	100					F = 74.85 p < 0.0001														Ma08	3	17	85	0.85	0.921954	1.1731
		R2	10	100	100	100	100	80	80	75	85	100	100																			Ma09	1	15	75	0.75	0.866025	1.0472
		R3	10	100	90	100	100	80	85	85	65	100	100																			Ma09	2	17	85	0.85	0.921954	1.1731
		Average	10	100	91.6667	100	100	78.3333	83.3333	80	75	100	100																			Ma09	3	13	65	0.65	0.806226	0.937744
		standard deviation	0	0	7.63763	0	0	2.88675	2.88675	5	10	0	0																			Ma14	1	20	100	1	1	1.5708
																																Ma14	2	20	100	1	1	1.5708
																																Ma14	3	20	100	1	1	1.5708
																																Ma34	1	20	100	1	1	1.5708
																																Ma34	2	20	100	1	1	1.5708
																																Ma34	3	20	100	1	1	1.5708
	LT50 from screening assay data (Table 2)
	Rearranged raw data			(number of dead adut females)
				Ma002			Ma003			Ma004			Ma005			Ma006			Ma007			Ma008			Ma009			Ma014			Ma034			Control
			Day	R1	R2	R3	R1	R2	R3	R1	R2	R3	R1	R2	R3	R1	R2	R3	R1	R2	R3	R1	R2	R3	R1	R2	R3	R1	R2	R3	R1	R2	R3	R1	R2	R3
			3	5	9	10	3	4	3	5	12	4	8	7	8	3	4	4	8	5	6	0	5	3	0	2	2	6	5	7	10	9	5	1	0	1
			4	18	16	17	5	14	10	14	20	10	15	18	18	12	12	10	10	10	12	11	8	8	0	9	6	18	12	11	16	19	11	1	1	2
			5	20	20	20	10	18	12	20	20	14	18	20	18	14	14	14	15	16	16	15	12	15	9	15	12	20	16	14	20	19	19	2	1	2
			6	20	20	20	12	20	18	20	20	16	20	20	20	15	16	16	17	16	17	16	15	17	15	17	13	20	20	20	20	20	20	2	2	2
	Corrected mortality
				Ma002			Ma003			Ma004			Ma005			Ma006			Ma007			Ma008			Ma009			Ma014			Ma034			Control
			Day	R1	R2	R3	R1	R2	R3	R1	R2	R3	R1	R2	R3	R1	R2	R3	R1	R2	R3	R1	R2	R3	R1	R2	R3	R1	R2	R3	R1	R2	R3	R1	R2	R3
			3	3.33333	7.77778	8.88889	1.11111	2.22222	1.11111	3.33333	11.1111	2.22222	6.66667	5.55556	6.66667	1.11111	2.22222	2.22222	6.66667	3.33333	4.44444	0	3.33333	1.11111	0	0	0	4.44444	3.33333	5.55556	8.88889	7.77778	3.33333	0	0	0
			4	17.7778	15.5556	16.6667	3.33333	13.3333	8.88889	13.3333	20	8.88889	14.4444	17.7778	17.7778	11.1111	11.1111	8.88889	8.88889	8.88889	11.1111	10	6.66667	6.66667	0	7.77778	4.44444	17.7778	11.1111	10	15.5556	18.8889	10	0	0	0
			5	20	20	20	8.88889	17.7778	11.1111	20	20	13.3333	17.7778	20	17.7778	13.3333	13.3333	13.3333	14.4444	15.5556	15.5556	14.4444	11.1111	14.4444	7.77778	14.4444	11.1111	20	15.5556	13.3333	20	18.8889	18.8889	0	0	0
			6	20	20	20	11.1111	20	17.7778	20	20	20	20	20	20	14.4444	15.5556	15.5556	16.6667	15.5556	16.6667	15.5556	14.4444	16.6667	14.4444	16.6667	12.2222	20	20	20	20	20	20	0	0	0
Results of LT50.									Bold data (AVERAGES) where included in Table 2.
		Ma002					Ma003				Ma004				Ma005				Ma006				Ma007				Ma008				Ma009				Ma014				Ma034
		PROBIT	R1	R2	R3	PROMEDIO	R1	R2	R3	PROMEDIO	R1	R2	R3	PROMEDIO	R1	R2	R3	PROMEDIO	R1	R2	R3	PROMEDIO	R1	R2	R3	PROMEDIO	R1	R2	R3	PROMEDIO	R1	R2	R3	PROMEDIO	R1	R2	R3	PROMEDIO	R1	R2	R3	PROMEDIO
		TL50	3.41006	3.21107	3.11054	3.24389	5.56201	3.786	4.45251	4.60017	3.63299	2.90467	4.39108	3.64291	3.39136	3.25887	3.21853	3.28959	4.46711	4.27231	4.39108	4.37683	3.85423	4.15429	3.91412	3.97421	4.42881	4.74401	4.46176	4.54486	5.40274	4.48502	5.21434	5.03403	3.35999	3.88743	3.83556	3.69433	3.14064	3.10528	3.80681	3.35091
		S.E.	0.11719	0.1823	0.19532	0.164937	0.5032	0.1534	0.21429	0.290297	0.1397	0.2066	0.25507	0.200457	0.21798	0.13558	0.21855	0.190703	0.28619	0.26108	0.25507	0.267447	0.38025	0.24814	0.25546	0.294617	0.21113	0.38619	0.20592	0.267747	0.19379	0.19179	0.30597	0.230517	0.12161	0.17904	0.25337	0.184673	0.2039	0.20522	0.15549	0.188203
		UPPER	3.64431	3.49913	3.39893	3.51412	7.04586	4.07369	4.88687	5.33547	3.8976	3.19994	4.91231	4.00328	3.73868	3.50398	3.54937	3.59734	5.074	4.78793	4.91231	4.92475	4.45167	4.62632	4.36303	4.48034	4.85416	5.69346	4.8772	5.14161	5.83794	4.86841	5.97455	5.5603	3.59818	4.21823	4.27081	4.02907	3.44407	3.40437	4.09818	3.64887
		LOWER	3.18507	2.8013	2.65774	2.88137	4.94452	3.47558	4.04696	4.15569	3.35234	2.42188	3.91247	3.2289	2.90649	2.97685	2.72043	2.86792	3.94782	3.76858	3.91247	3.87629	3.02577	3.66106	3.37876	3.3552	4.02703	4.13944	4.07031	4.07893	5.07233	4.11728	4.74751	4.64571	3.12234	3.52167	3.2971	3.3137	2.67068	2.62788	3.49201	2.93019
		x2	0.0207	0.86107	0.51123	0.464333	0.59574	0.53681	2.51107	1.21454	1.20418	1.28857	0.51459	1.00245	0.61327	0.07279	3.09295	1.25967	4.70612	1.95567	0.51459	2.39213	0.85992	1.4883	0.60896	0.985727	4.43284	0.00104	0.25433	1.56274	1.55864	2.05498	2.26061	1.95808	0.03399	1.24239	4.64889	1.97509	1.05628	2.72323	1.6263	1.80194
		m	1.27255	1.03705	1.03856	1.11605	0.797763	1.08559	0.926541	0.952623	1.14681	1.06762	0.83356	1.03507	0.921618	1.17377	0.952568	1.03119	0.791137	0.81328	0.83356	0.813004	0.673892	0.829799	0.815285	0.778459	0.931796	0.71562	0.949712	0.877921	1.16647	0.994726	0.900627	1.03483	1.2369	0.989321	0.821152	1.04968	1.00655	1.01702	1.07705	1.03467
		S.E.(m)	0.59526	0.405363	0.439018	0.479881	0.223584	0.350364	0.221383	0.269421	0.433392	0.401092	0.175764	0.350876	0.257285	0.543995	0.314449	0.390377	0.163161	0.166389	0.175764	0.168471	0.133577	0.170886	0.167598	0.157678	0.223348	0.149607	0.23597	0.204612	0.534601	0.269006	0.262242	0.374839	0.574705	0.257635	0.171413	0.371041	0.39135	0.414754	0.339888	0.383111
		b	-4.97901	-0.51771	-0.38591	-1.96088	0.32207	-2.04136	-0.47672	-0.732003	-2.85599	-0.41121	0.61993	-0.882423	0.57208	-2.65498	0.44866	-0.544747	0.98146	0.89723	0.61993	0.832873	2.23469	0.82038	1.12679	1.39395	-0.52359	1.48714	-0.7849	0.05955	-5.74831	-1.43897	-0.70514	-2.63081	-4.08172	-0.7534	1.13244	-1.23423	-0.04573	-0.11769	-1.9327	-0.698707

## Sheet: BEAUVERIA
		Values of mortality in screening assay (Beauveria) (Figure 2)																													ARC SIN transformation											ANOVA & Tukey analysis
conidia/mL:	100000000
						cumulative mortality		(number of dead adut females)
R: Independent experiments	R1	Day	Control	Bb005	Bb014	Bb015	Bb016	Bb017	Bb018	Bb019	Bb020	Bb021	Bb022	Bb023																			dead mites
		3	0	1	2	0	5	0	0	0	0	0	0	0																	Treatment	Repetition		% mortality (reordered)	proportion	square root	arcsen
		4	0	6	7	2	12	1	0	2	2	3	3	4																	control	1	0	0	0	0	0
		5	0	12	9	7	16	2	2	5	2	9	4	4																	control	2	2	10	0.1	0.316228	0.321751
		6	0	15	11	9	19	4	3	7	9	10	10	4																	control	3	2	10	0.1	0.316228	0.321751
		Mortality(%)	0	75	55	45	95	20	15	35	45	50	50	20																	Bb05	1	15	75	0.75	0.866025	1.0472
	R2	Day	Control	Bb005	Bb014	Bb015	Bb016	Bb017	Bb018	Bb019	Bb020	Bb021	Bb022	Bb023																	Bb05	2	16	80	0.8	0.894427	1.10715
		3	0	2	0	0	4	0	0	0	0	0	0	0																	Bb05	3	16	80	0.8	0.894427	1.10715
		4	0	7	8	2	14	3	3	4	2	3	3	4																	Bb14	1	11	55	0.55	0.74162	0.835482
		5	1	13	13	4	18	4	5	7	2	9	4	5																	Bb14	2	16	80	0.8	0.894427	1.10715
		6	2	16	16	8	20	5	5	10	3	10	4	7																	Bb14	3	15	75	0.75	0.866025	1.0472
		Mortality(%)	10	80	80	40	100	25	25	50	15	50	20	35																	Bb15	1	9	45	0.45	0.67082	0.735314
	R3	Day	Control	Bb005	Bb014	Bb015	Bb016	Bb017	Bb018	Bb019	Bb020	Bb021	Bb022	Bb023																	Bb15	2	8	40	0.4	0.632456	0.684719
		3	0	1	1	0	4	0	2	1	0	0	1	1																	Bb15	3	7	35	0.35	0.591608	0.633052
		4	0	6	5	2	9	3	2	2	0	2	4	2																	Bb16	1	19	95	0.95	0.974679	1.34528
		5	2	10	12	6	13	4	2	4	2	6	4	2																	Bb16	2	20	100	1	1	1.5708
		6	2	16	15	7	18	6	6	8	2	6	6	3																	Bb16	3	18	90	0.9	0.948683	1.24905
		Mortality(%)	10	80	75	35	90	30	30	40	10	30	30	15																	Bb17	1	4	20	0.2	0.447214	0.463648
																															Bb17	2	5	25	0.25	0.5	0.523599
																															Bb17	3	6	30	0.3	0.547723	0.57964
																															Bb18	1	3	15	0.15	0.387298	0.397699
					Mortality(%)															F = 17.55 p < 0.0001											Bb18	2	5	25	0.25	0.5	0.523599
			Control	Bb005	Bb014	Bb015	Bb016	Bb017	Bb018	Bb019	Bb020	Bb021	Bb022	Bb023																	Bb18	3	6	30	0.3	0.547723	0.57964
		R1	0	75	55	45	95	20	15	35	45	50	50	20																	Bb19	1	7	35	0.35	0.591608	0.633052
		R2	10	80	80	40	100	25	25	50	15	50	20	35																	Bb19	2	10	50	0.5	0.707107	0.785398
		R3	10	80	75	35	90	30	30	40	10	30	30	15																	Bb19	3	8	40	0.4	0.632456	0.684719
		Average	6.66667	78.3333	70	40	95	25	23.3333	41.6667	23.3333	43.3333	33.3333	23.3333																	Bb20	1	9	45	0.45	0.67082	0.735314
		standard deviation	5.7735	2.88675	13.2288	5	5	5	7.63763	7.63763	18.9297	11.547	15.2753	10.4083																	Bb20	2	3	15	0.15	0.387298	0.397699
																															Bb20	3	2	10	0.1	0.316228	0.321751
																															Bb21	1	10	50	0.5	0.707107	0.785398
																															Bb21	2	10	50	0.5	0.707107	0.785398
		LT50 from screening assay data (Table 2)																													Bb21	3	6	30	0.3	0.547723	0.57964
																															Bb22	1	10	50	0.5	0.707107	0.785398
				corrected mortality																											Bb22	2	4	20	0.2	0.447214	0.463648
				Bb005			Bb014			Bb015			Bb016			Bb019			Bb021												Bb22	3	6	30	0.3	0.547723	0.57964
			día	R1	R2	R3	R1	R2	R3	R1	R2	R3	R1	R2	R3	R1	R2	R3	R1	R2	R3										Bb23	1	4	20	0.2	0.447214	0.463648
			3	1	2	0	2	0	0	0	0	0	5	2.22222	2.22222	0	0	0	0	0	0										Bb23	2	7	35	0.35	0.591608	0.633052
			4	6	5.55556	4.44444	7	6.66667	3.33333	2	0	0	12	13.3333	7.77778	2	2.22222	0	3	1.11111	0										Bb23	3	3	15	0.15	0.387298	0.397699
			5	12	12.2222	8.88889	9	12.2222	11.1111	7	2.22222	4.44444	16	17.7778	12.2222	5	5.55556	2.22222	9	7.77778	4.44444
			6	15	15.5556	15.5556	11	15.5556	14.4444	9	6.66667	11.1111	19	20	17.7778	7	8.88889	6.66667	10	8.88889	4.44444
	Results of LT50.									Bold data (AVERAGES) where included in Table 2.
				Bb005				Bb014				Bb015				Bb016				Bb019				Bb021
		PROBIT		R1	R2	R3	AVERAGE	R1	R2	R3	AVERAGE	R1	R2	R3	AVERAGE	R1	R2	R3	AVERAGE	R1	R2	R3	AVERAGE	R1	R2	R3	AVERAGE
		TL50		4.75328	4.62313	5.015	4.79714	5.38366	4.69406	5.0958	5.05784	5.56934	6.39959	5.83361	5.93418	3.71898	3.786	4.38508	3.96335	6.66748	6.07498	6.39959	6.38068	5.6352	5.87917	7.3683	6.29422
		S.E.		0.25621	0.25821	0.21721	0.243877	0.74893	0.21451	0.23572	0.39972	0.33405	0.85003	0.28718	0.49042	0.2317	0.1534	0.22228	0.20246	1.27274	0.63897	0.85003	0.92058	0.44669	0.47916	3.42042	1.44876
		UPPER		5.3215	5.18278	5.49212	5.33213	7.93641	5.14522	5.63206	6.2379	6.46022	9.83853	6.62547	7.64141	4.11215	4.07369	4.83204	4.33929	11.9951	8.16548	9.83853	9.99971	6.91676	7.32162	35.6376	16.6253
		LOWER		4.30839	4.16418	4.63478	4.36912	4.60843	4.30163	4.69835	4.53614	5.10735	5.85412	5.46313	5.47487	3.22162	3.47558	3.9616	3.55293	5.70127	5.41062	5.85412	5.65534	5.07101	5.3212	6.13145	5.50789
		x2		0.28255	0.10122	0.69045	0.358073	0.67254	1.74129	1.12932	1.18105	0.20252	0.15609	0.36321	0.240607	0.17274	0.53681	0.8254	0.51165	0.63899	0.48562	0.15609	0.4269	1.84058	2.40328	2.57136	2.27174
		m		0.88141	0.856871	1.01341	0.922835	0.63922	0.960003	0.989958	0.889282	0.967404	1.10698	1.15668	1.08415	0.86461	1.08559	0.899672	0.961222	0.798667	0.87237	1.10698	0.946735	0.864299	0.92551	0.860548	0.884489
		S.E. (m)		0.212885	0.193648	0.334476	0.251607	0.150087	0.257904	0.322819	0.249334	0.363241	0.684273	0.611937	0.5734	0.193486	0.350364	0.204258	0.255466	0.321111	0.332436	0.684273	0.480881	0.27659	0.362705	0.482546	0.382224
		b		-0.15222	0.21754	-2.22227	-0.718983	1.81445	-1.12464	-1.91048	-0.40689	-1.91877	-5.31339	-5.98683	-4.40633	0.82356	-2.04136	-0.09556	-0.437787	-0.18292	-0.84028	-5.31339	-2.1122	-0.49397	-1.48059	-1.29146	-1.08867

## Sheet: LECANICILIUM
				Values of mortality in screening assay (Lecanicillium) (Figure 2)
conidia/mL:		100000000
R: Independent experiments
	R1	Day	Control	Lsp.001	Lsp.002	Lsp.003	Lsp.004	Lsp.005	Lsp.006	Lsp.007	Lsp.008	Lsp.009
		3	0	0	2	2	0	1	0	0	0	1
		4	1	3	6	2	1	1	2	0	0	2
		5	1	4	7	3	1	3	7	1	1	2
		6	2	8	9	3	1	4	7	1	2	4
		Mortality(%)	10	40	45	15	5	20	35	5	10	20
	R2	Day	Control	Lsp.001	Lsp.002	Lsp.003	Lsp.004	Lsp.005	Lsp.006	Lsp.007	Lsp.008	Lsp.009
		3	0	0	0	1	0	1	1	0	0	1
		4	1	0	2	1	0	2	1	0	1	2
		5	1	2	4	2	1	2	2	0	2	4
		6	1	3	4	2	1	2	3	0	2	5
		Mortality(%)	5	15	20	10	5	10	15	0	10	25
		Day	Control	Lsp.001	Lsp.002	Lsp.003	Lsp.004	Lsp.005	Lsp.006	Lsp.007	Lsp.008	Lsp.009
	R3	3	1	2	5	2	2	1	5	0	0	5
		4	2	4	6	7	5	1	5	0	0	5
		5	3	6	6	7	7	2	8	1	1	11
		6	4	7	7	7	8	3	8	1	1	12
		Mortality(%)	20	35	35	35	40	15	40	5	5	60
		MORTALITY (%)	Control	Lsp.001	Lsp.002	Lsp.003	Lsp.004	Lsp.005	Lsp.006	Lsp.007	Lsp.008	Lsp.009
		R1	10	40	45	15	5	20	35	5	10	20
		R2	5	15	20	10	5	10	15	0	10	25
		R3	20	35	35	35	40	15	40	5	5	60
		Average	11.6667	30	33.3333	20	16.6667	15	30	3.33333	8.33333	35
		standard deviation	7.63763	13.2288	12.5831	13.2288	20.2073	5	13.2288	2.88675	2.88675	21.7945			F = 2.90 p < 0.023
		ARC SIN transformation								ANOVA & Tukey analysis
			dead mites
	Treatment	Repetition		% mortality	proportion	square root	arcsen
	control	1	2	10	0.1	0.316228	0.321751
	control	2	1	5	0.05	0.223607	0.225513
	control	3	4	20	0.2	0.447214	0.463648
	Lsp.01	1	8	40	0.4	0.632456	0.684719
	Lsp.01	2	3	15	0.15	0.387298	0.397699
	Lsp.01	3	7	35	0.35	0.591608	0.633052
	Lsp.02	1	9	45	0.45	0.67082	0.735314
	Lsp.02	2	4	20	0.2	0.447214	0.463648
	Lsp.02	3	7	35	0.35	0.591608	0.633052
	Lsp.03	1	3	15	0.15	0.387298	0.397699
	Lsp.03	2	2	10	0.1	0.316228	0.321751
	Lsp.03	3	7	35	0.35	0.591608	0.633052
	Lsp.04	1	1	5	0.05	0.223607	0.225513
	Lsp.04	2	1	5	0.05	0.223607	0.225513
	Lsp.04	3	8	40	0.4	0.632456	0.684719
	Lsp.05	1	4	20	0.2	0.447214	0.463648
	Lsp.05	2	2	10	0.1	0.316228	0.321751
	Lsp.05	3	3	15	0.15	0.387298	0.397699
	Lsp.06	1	7	35	0.35	0.591608	0.633052
	Lsp.06	2	3	15	0.15	0.387298	0.397699
	Lsp.06	3	8	40	0.4	0.632456	0.684719
	Lsp.07	1	1	5	0.05	0.223607	0.225513
	Lsp.07	2	0	0	0	0	0
	Lsp.07	3	1	5	0.05	0.223607	0.225513
	Lsp.08	1	2	10	0.1	0.316228	0.321751
	Lsp.08	2	2	10	0.1	0.316228	0.321751
	Lsp.08	3	1	5	0.05	0.223607	0.225513
	Lsp.09	1	4	20	0.2	0.447214	0.463648
	Lsp.09	2	5	25	0.25	0.5	0.523599
	Lsp.09	3	12	60	0.6	0.774597	0.886077
