# Supplementary material for: High susceptibility of Tetranychus merganser (Acari: Tetranychidae), an emergent pest of the tropical crop Carica papaya, towards Metarhizium anisopliae s.l. and Beauveria bassiana strains
Source: PeerJ. 2022 Oct 24;10:e14064. doi: 10.7717/peerj.14064 (PMC9610662; doi:10.7717/peerj.14064)
Supplement: Supplemental Information 2 [file peerj-10-14064-s002.xlsx]

## Sheet: Ma02
			Raw data for CL50 analysis (Table 3 )
		STRAIN	Ma002
			CUMULATIVE MORTALITY
		(conidia/ml)	Day 3	Day 4	Day 5	Day 6	Day 7		(conidia/ml)	Day 3	Day 4	Day 5	Day 6	Day 7
	R1	100000000	4	15	18	20	20	R7	100000000	3	9	17	20	20
		10000000	4	7	11	15	15		10000000	1	4	11	13	14
		1000000	0	2	5	5	7		1000000	0	1	4	5	8
		100000	0	0	2	2	2		100000	0	0	3	3	3
		10000	0	0	0	0	0		10000	0	0	0	0	0
		Control	0	0	0	1	1		Control	1	1	1	1	1
	R2	100000000	7	10	13	17	19	R8	100000000	4	11	11	18	20
		10000000	3	5	11	11	12		10000000	2	5	8	11	11
		1000000	0	3	3	5	5		1000000	1	3	3	3	5
		100000	0	0	2	2	2		100000	0	1	1	1	1
		10000	0	0	0	0	0		10000	0	0	0	0	0
		Control	0	0	0	0	0		Control	0	0	0	0	0
	R3	100000000	3	9	15	20	20	R9	100000000	3	6	15	20	20
		10000000	1	6	6	12	12		10000000	3	6	6	13	13
		1000000	2	3	3	7	7		1000000	0	4	5	5	5
		100000	0	1	1	1	2		100000	0	1	1	1	2
		10000	0	0	0	0	0		10000	0	0	0	1	1
		Control	0	0	0	0	0		Control	0	0	0	1	1
			CUMULATIVE MORTALITY (7th day)
		(conidia/ml)	R1	R2	R3	R4	R5	R6
		100000000	20	19	20	20	20	20
		10000000	15	12	12	14	11	13
		1000000	7	5	7	8	5	5
		100000	2	2	2	3	1	2
		10000	0	0	0	0	0	1
		Control	1	0	0	1	0	1
						CORRECTED MORTALITY
		(conidia/ml)	R1	R2	R3	R4	R5	R6
		100000000	20	19	20	20	20	20
		10000000	14.7368	12	12	13.6842	11	12.6316
		1000000	6.31579	5	7	7.36842	5	4.21053
		100000	2.10526	2	2	2.10526	1	1.05263
		10000	0	0	0	0	0	0
		Control	0	0	0	0	0	0
			R1	R2	R3	R4	R5	R6
		CL50	2.44516e+06	3.93357e+06	2.72906e+06	2.1318e+06	4.23838e+06	3.7691e+06
		standard error	894563	1.70915e+06	1.13254e+06	883138	1.6551e+06	1.39657e+06
		UPPER 95%	4.94628e+06	9.24458e+06	6.10818e+06	4.63616e+06	9.0628e+06	7.71672e+06
		LOWER 95%	1.21496e+06	1.76876e+06	1.2539e+06	954227	2.03371e+06	1.8631e+06
		x2	0.67477	1.35556	3.00631	1.39932	2.78479	1.86149
		m	1.37496	0.93026	1.34615	1.08011	1.16492	1.27817
		standard error (m)	0.24627	0.16565	0.24086	0.19527	0.20157	0.22486
		b	-3.30653	-1.39666	-1.63989	-2.01172	-2.72019	-3.40557
			R1	R2	R3	R4	R5	R6
		TL50	3.56539	3.82085	4.01466	3.93348	4.07287	4.15246
		standard error	0.16853	0.32532	0.17737	0.16743	0.23191	0.17467
		UPPER 95%	3.86472	4.33612	4.34282	4.24428	4.48657	4.47961
		LOWER 95%	3.21128	3.1069	3.65244	3.59222	3.58948	3.79882
		x2	0.99151	1.359	2.39324	1.59081	5.00109	4.61549
		m	10.5521	5.07595	9.78859	10.6288	6.93245	10.1823
		standard error (m)	2.00212	1.12662	1.63912	1.81108	1.25751	1.67608
		b	-0.82589	2.04498	-0.90887	-1.32175	0.7719	-1.29577

## Sheet: Ma003
	STRAIN	Ma003
		CUMULATIVE MORTALITY
	(conidia/ml)	Day 3	Day 4	Day 5	Day 6	Day 7		(conidia/ml)	Day 3	Day 4	Day 5	Day 6	Day 7
R1	100000000	7	13	18	20	20	R4	100000000	7	11	18	19	19
	10000000	7	10	13	14	15		10000000	6	8	13	16	16
	1000000	3	4	8	10	10		1000000	2	2	9	9	9
	100000	0	1	1	2	2		100000	0	1	1	1	1
	10000	0	0	0	1	2		10000	0	0	0	0	0
	Control	0	1	1	1	1		Control	0	0	0	0	0
R2	100000000	3	7	13	18	18	R5	100000000	0	5	11	18	20
	10000000	1	7	8	11	11		10000000	3	7	7	10	15
	1000000	1	3	3	6	6		1000000	1	3	3	8	9
	100000	0	1	1	2	3		100000	1	1	3	3	3
	10000	0	0	0	0	0		10000	0	0	0	0	0
	Control	0	1	1	1	1		Control		0	0	0	0
R3	100000000	1	7	11	17	17	R6	100000000	12	15	20	20	20
	10000000	0	2	6	15	15		10000000	1	10	12	16	16
	1000000	0	1	3	7	7		1000000	0	5	9	12	12
	100000	1	0	0	3	4		100000	0	0	1	1	1
	10000	0	0	0	0	0		10000	0	0	0	0	0
	Control	0	0	0	0	0		Control	0	1	2	2	2
		CUMULATIVE MORTALITY (7th day)
	(conidia/ml)	R1	R2	R3	R4	R5	R6
	100000000	20	18	17	19	20	20
	10000000	15	11	15	16	15	16
	1000000	10	6	7	9	9	12
	100000	2	3	4	1	3	1
	10000	2	0	0	0	0	0
	Control	1	1	0	0	0	2
		corrected mortality
	(conidia/ml)	R1	R2	R3	R4	R5	R6
	100000000	20	17.9	17	19	20	20
	10000000	14.7	10.5	15	16	15	15.5
	1000000	9.4	5.2	7	9	9	11.1
	100000	1.05	2.1	4	1	3	0
	10000	1.05	0	0	0	0	0
	Control	0	0	0	0	0	0
		R1	R2	R3	R4	R5	R6
	CL50	1.51688e+06	5.18607e+06	2.41932e+06	1.87324e+06	1.39968e+06	1.5046e+06
	standard error	630040	2.45674e+06	1.22893e+06	741131	569538	529486
	UPPER 95%	3.36863e+06	1.33996e+07	6.54313e+06	4.01259e+06	3.0554e+06	2.95987e+06
	LOWER 95%	690622	2.22888e+06	964813	883710	645886	765400
	x2	3.86243	0.93413	2.10739	1.13947	1.60593	4.0626
	m	1.01617	0.88235	0.76741	1.11178	1.05235	1.40626
	standard error (m)	0.16469	0.15215	0.12943	0.18384	0.1711	0.25176
	b	-1.28087	-0.92483	0.10106	-1.97375	-1.46775	-3.68706
		R1	R2	R3	R4	R5	R6
	TL50	3.43951	4.35127	4.69836	3.52742	4.71159	2.90732
	standard error	0.20766	0.23115	0.23097	0.26565	0.16746	0.32523
	UPPER 95%	3.78138	4.78194	5.1505	3.94813	5.03028	3.30264
	LOWER 95%	2.98489	3.88338	4.24809	2.93969	4.37621	2.13212
	x2	1.09933	1.09442	1.51178	1.80796	1.4567	3.0005
	m	8.48398	7.01499	7.34456	6.44486	12.3785	7.67702
	standard error (m)	1.67272	1.25036	1.29159	1.30561	2.08355	2.09752
	b	0.44837	0.52011	0.06485	1.47172	-3.33283	1.44175

## Sheet: Ma04
		STRAIN: Ma004
				cumulative mortality
		(conidia/ml)	Day 3	Day 4	Day 5	Day 6	Day 7		(conidia/ml)	Day 3	Day 4	Day 5	Day 6	Day 7
	R1	100000000	4	13	13	15	17	R4	100000000	0	7	9	9	15
		10000000	4	9	11	11	11		10000000	0	9	11	11	11
		1000000	1	3	4	6	6		1000000	1	2	4	4	7
		100000	0	0	1	1	2		100000	0	0	1	1	2
		10000	0	0	0	0	0		10000	0	0	0	0	0
		Control	0	1	1	1	1		Control	0	0	0	0	1
	R2	100000000	3	9	15	15	15	R5	100000000	3	8	15	16	16
		10000000	4	8	8	9	9		10000000	3	3	7	9	9
		1000000	2	4	4	4	5		1000000	1	2	2	6	6
		100000	0	0	1	1	2		100000	0	0	1	1	1
		10000	0	0	0	0	0		10000	0	0	0	0	0
		Control	0	1	1	1	1		Control	0	0	0	0	0
	R3	100000000	1	6	11	17	17	R6	100000000	4	8	9	9	15
		10000000	0	1	9	9	9		10000000	3	3	7	9	9
		1000000	0	2	2	2	2		1000000	0	1	4	4	7
		100000	0	0	0	1	1		100000	0	0	1	2	2
		10000	0	0	0	0	0		10000	0	0	0	0	0
		Control	0	0	0	0	0		Control	0	1	1	1	1
			CUMULATIVE MORTALITY (7th day)
		(conidia/ml)	R1	R2	R3	R4	R5	R6
		100000000	17	15	17	15	16	15
		10000000	11	9	9	11	9	9
		1000000	6	5	2	7	6	7
		100000	2	2	1	2	1	2
		10000	0	0	0	0	0	0
		Control	1	1	0	1	0	1
			corrected mortality
		Concentration	R1	R2	R3	R4	R5	R6
		100000000	16.84	14.73	17	14.7368	16	12.6316
		10000000	10.52	8.42	9	10.5263	9	8.42105
		1000000	5.26	4.21	2	6.31579	6	6.31579
		100000	1.05	1.05	1	1.05263	1	1.05263
		10000	0	0	0	0	0	0
		Testigo	0	0	0	0	0	0
			R1	R2	R3	R4	R5	R6
		CL50	6.7693e+06	1.55507e+07	1.6247e+07	8.49514e+06	9.23216e+06	1.95001e+07
		standard error	3.21668e+06	9.26399e+06	6.14955e+06	4.75161e+06	5.06012e+06	1.50182e+07
		UPPER 95%	1.77102e+07	5.58765e+07	3.4792e+07	2.71862e+07	2.89166e+07	1.05041e+08
		LOWER 95%	2.93064e+06	6.09657e+06	8.15778e+06	3.35628e+06	3.71014e+06	6.51627e+06
		x2	0.17854	0.38333	0.04823	1.08902	1.2207	1.75055
		m	0.90002	0.78337	1.34916	0.76505	0.79004	0.64391
		standard error (m)	0.15868	0.15231	0.26979	0.14009	0.14509	0.13214
		b	-1.14765	-0.6338	-4.72851	-0.30119	-0.50284	0.30584
			R1	R2	R3	R4	R5	R6
		TL50	4.01622	4.37102	4.75561	5.51543	4.35426	5.27789
		standard error	0.36439	0.33217	0.22709	0.36521	0.28672	0.63422
		UPPER 95%	4.60268	4.9736	5.20271	6.38802	4.87945	6.99333
		LOWER 95%	3.22671	3.69335	4.31486	4.92855	3.77008	4.3712
		x2	2.75128	3.30649	1.23269	5.24427	2.43583	2.30291
		m	4.49579	4.78812	7.59276	5.61412	5.52314	3.3303
		standard error (m)	1.07901	1.08785	1.3221	1.21241	1.13246	1.03669
		b	2.28536	1.93281	-0.14186	0.83669	1.47119	2.59399

## Sheet: Ma05
		STRAIN: Ma005
			cumulative mortality
		(conidia/ml)	Day 3	Day 4	Day 5	Day 6	Day 7		(conidia/ml)	Day 3	Day 4	Day 5	Day 6	Day 7
	R1	100000000	10	15	20	20	20	R4	100000000	4	6	15	20	20
		10000000	5	9	15	15	15		10000000	4	6	17	17	17
		1000000	3	5	9	10	10		1000000	2	3	8	11	11
		100000	1	3	5	5	6		100000	2	2	5	7	7
		10000	0	0	0	0	0		10000	0	0	0	3	3
		control	0	0	1	2	2		control	0	0	0	1	1
	R2	100000000	9	12	20	20	20	R5	100000000	4	10	20	20	20
		10000000	3	5	11	15	15		10000000	5	8	13	17	17
		1000000	3	3	10	10	11		1000000	2	3	7	7	8
		100000	1	2	3	3	3		100000	3	3	4	4	4
		10000	0	0	0	0	0		10000	0	0	0	1	1
		control	0	2	2	2	2		control	0	0	0	0	0
	R3	100000000	5	9	19	20	20	R6	100000000	3	5	18	18	19
		10000000	5	8	9	14	15		10000000	1	5	5	11	11
		1000000	3	3	3	5	5		1000000	0	0	2	2	4
		100000	1	3	3	3	3		100000	0	3	3	3	3
		10000	0	0	0	0	1		10000	0	0	0	0	0
		control	0	0	2	2	2		control	0	1	1	1	1
			CUMULATIVE MORTALITY (7th day)
		(conidia/ml)	R1	R2	R3	R4	R5	R6
		100000000	20	20	20	20	20	19
		10000000	15	15	15	17	17	11
		1000000	10	10	5	11	8	9
		100000	6	3	3	7	4	3
		10000	0	0	1	3	1	0
		control	2	2	2	1	0	1
			corrected mortality
		(conidia/ml)	R1	R2	R3	R4	R5	R6
		100000000	20	20	20	20	20	18.9474
		10000000	14.4	14.4	14.4	16.8421	17	10.5263
		1000000	8.88	8.88	3.33	10.5263	8	8.42105
		100000	4.44	1.11	1.11	6.31579	4	2.10526
		10000	0	0	0	2.10526	1	0
		control	0	0	0	0	0	0
			R1	R2	R3	R4	R5	R6
		CL50	1.39765e+06	2.00857e+06	3.74846e+06	471743	938547	3.22624e+06
		standard error	603035	772937	1.34056e+06	224048	402148	1.47228e+06
		UPPER 95%	3.19713e+06	4.21371e+06	7.47487e+06	1.13153e+06	2.12025e+06	7.91019e+06
		LOWER 95%	618429	965417	1.89255e+06	187408	414558	1.3996e+06
		x2	2.90758	2.34248	2.64409	0.9625	1.92601	2.52277
		m	0.1534	0.19663	0.24679	0.13735	0.15453	0.14975
		standard error (m)	0.1534	0.19663	0.24679	0.13735	0.15453	0.14975
		b	-0.85137	-2.38692	-4.01481	0.27009	-0.74134	-0.85009
			R1	R2	R3	R4	R5	R6
		TL50	3.09706	3.29108	3.72166	4.08324	3.70024	4.19853
		standard error	0.23134	0.211	0.17113	0.18323	0.15285	0.19641
		UPPER 95%	3.43052	3.62455	4.03121	4.42256	3.98414	4.56296
		LOWER 95%	2.56042	2.81956	3.36652	3.70942	3.38867	3.79869
		x2	2.19964	5.46887	4.42282	5.94713	4.27691	5.9706
		m	9.01861	8.81024	10.2169	9.37603	12.081	8.56908
		standard error (m)	2.14643	1.86255	1.82935	1.55842	2.22255	1.4292
		b	0.57232	0.44213	-0.83116	-0.7288	-1.86479	-0.33937

## Sheet: Ma14
		STRAIN: Ma014
			cumulative mortality
		(conidia/ml)	Day 3	Day 4	Day 5	Day 6	Day 7		(conidia/ml)	Day 3	Day 4	Day 5	Day 6	Day 7
	R1	100000000	0	4	9	11	11	R4	100000000	0	5	9	13	13
		10000000	0	3	8	9	9		10000000	0	3	3	7	9
		1000000	0	1	3	8	8		1000000	0	1	3	3	5
		100000	0	0	1	1	2		100000	0	0	1	1	2
		10000	0	0	0	0	0		10000	0	0	0	0	0
		control	0	1	1	1	1		control	0	0	0	0	0
	R2	100000000	0	2	5	10	10	R5	100000000	0	0	4	7	11
		10000000	0	0	4	7	7		10000000	0	1	1	4	7
		1000000	0	0	3	3	3		1000000	0	0	2	2	4
		100000	0	1	2	2	2		100000	0	0	1	1	1
		10000	0	0	0	0	0		10000	0	0	0	0	0
		control	0	1	1	1	1		control	0	0	1	1	1
	R3	100000000	0	3	8	11	11	R6	100000000	0	3	3	9	15
		10000000	0	1	2	5	6		10000000	0	3	6	8	9
		1000000	0	1	1	2	3		1000000	0	2	4	4	5
		100000	0	0	1	1	1		100000	0	1	1	1	1
		10000	0	0	0	0	0		10000	0	0	0	0	0
		control	0	0	0	0	0		control	0	1	0	0	2
				CUMULATIVE MORTALITY (7th day)
			(conidia/ml)	R1	R2	R3	R4	R5	R6
			100000000	11	10	11	13	11	15
			10000000	9	7	6	9	7	9
			1000000	8	3	3	5	4	5
			100000	2	2	1	2	1	1
			10000	0	0	0	0	0	0
			control	1	1	1	0	1	2
				corrected mortality
			(conidia/ml)	R1	R2	R3	R4	R5	R6
			100000000	10.52	9.47	10.52	13	10.5263	14.4444
			10000000	8.42	6.31	5.26	9	6.31579	7.77778
			1000000	7.36	2.1	2.1	5	3.15789	3.33333
			100000	1.05	1.05	0	2	0	0
			10000	0	0	0	0	0	0
			control	0	0	0	0	0	0
				R1	R2	R3	R4	R5	R6
			CL50	2.93722e+07	1.27137e+08	6.54544e+07	1.77136e+07	5.48293e+07	2.15322e+07
			standard error	3.04597e+07	2.08222e+08	5.60242e+07	1.40854e+07	4.83538e+07	1.19298e+07
			UPPER 95%	2.84917e+08	4.12912e+09	4.80975e+08	1.00086e+08	4.1266e+08	7.17005e+07
			LOWER 95%	8.12976e+06	2.85597e+07	2.2986e+07	5.74749e+06	1.82625e+07	9.01365e+06
			x2	3.66116	0.50903	0.50569	0.72185	1.10112	0.70985
			m	0.54991	0.57488	0.80548	0.61618	0.73323	0.8954
			standard error (m)	0.12256	0.14766	0.19411	0.12686	0.16934	0.18175
			b	0.89333	0.34101	-1.29558	0.53373	-0.67451	-1.56604
				R1	R2	R3	R4	R5	R6
			TL50	5.92453	6.49346	6.03287	5.49675	6.63999	6.06432
			standard error	0.44811	0.52683	0.43339	0.32754	0.42376	0.32825
			UPPER 95%	7.09802	7.98203	7.16563	6.25626	7.8118	6.86896
			LOWER 95%	5.27828	5.80953	5.40829	4.95372	6.08383	5.55629
			x2	3.30878	1.53276	2.55753	2.82891	1.26123	3.30058
			m	5.50865	6.30128	5.96209	6.19778	8.81034	7.94649
			standard error (m)	1.25656	1.49486	1.33368	1.27083	2.14753	1.67791
			b	0.74372	-0.11964	0.34645	0.41298	-2.24358	-1.22037

## Sheet: Ma34
		STRAIN: Ma034
			cumulative mortality
		(conidia/ml)	Day 3	Day 4	Day 5	Day 6	Day 7		(conidia/ml)	Day 3	Day 4	Day 5	Day 6	Day 7
	R1	100000000	11	17	20	20	20	R4	100000000	5	11	17	20	20
		10000000	7	11	17	17	17		10000000	5	7	15	15	18
		1000000	3	9	10	13	13		1000000	2	7	7	9	9
		100000	0	3	7	7	7		100000	2	2	2	4	4
		10000	0	0	0	3	3		10000	0	0	0	0	0
		control	0	0	1	2	2		control	0	0	0	0	0
	R2	100000000	6	9	19	19	20	R5	100000000	5	5	11	19	19
		10000000	1	3	13	13	13		10000000	3	7	7	15	15
		1000000	1	5	9	9	9		1000000	2	5	11	11	11
		100000	1	3	4	4	5		100000	3	3	5	5	5
		10000	0	0	0	0	0		10000	0	0	1	1	1
		control	0	1	1	2	2		control	0	1	1	1	1
	R3	100000000	5	10	20	20	20	R6	100000000	5	7	17	20	20
		10000000	0	2	10	10	11		10000000	4	4	10	14	17
		1000000	0	2	5	5	5		1000000	2	2	5	5	5
		100000	0	0	1	1	2		100000	2	2	2	2	2
		10000	0	0	0	0	0		10000	0	0	0	0	0
		control	0	0	0	0	0		control	0	0	0	0	0
			CUMULATIVE MORTALITY (7th day)
		(conidia/ml)	R1	R2	R3	R4	R5	R6
		100000000	20	20	20	20	19	20
		10000000	17	13	11	18	15	17
		1000000	13	9	5	9	11	5
		100000	7	5	2	4	5	2
		10000	3	0	0	0	1	0
		control	2	2	0	0	1	0
			corrected mortality
		(conidia/ml)	R1	R2	R3	R4	R5	R6
		100000000	20	20	20	20	18.9474	20
		10000000	16.66	12.2	11	18	14.7368	17
		1000000	12.2	7.77	5	9	10.5263	5
		100000	5.55	3.33	2	4	4.21053	2
		10000	1.1	0	0	0	0	0
		control	0	0	0	0	0	0
			R1	R2	R3	R4	R5	R6
		CL50	492471	2.19265e+06	3.76045e+06	870306	1.17346e+06	1.87967e+06
		standard error	218702	956167	1.5639e+06	334387	530273	685687
		UPPER 95%	1.12753e+06	5.10571e+06	8.47865e+06	1.81485e+06	2.77855e+06	3.7909e+06
		LOWER 95%	208432	971359	1.73494e+06	416721	499508	934797
		x2	0.77903	3.88727	3.9707	1.5999	1.51199	2.56612
		m	0.91755	0.94593	1.04243	1.17034	0.88426	1.30448
		standard error (m)	0.14942	0.15439	0.17603	0.19473	0.14262	0.22684
		b	-0.22304	-0.99813	-1.85421	-1.95141	-0.36697	-3.18444
		PROBIT	R1	R2	R3	R4	R5	R6
		TL50	2.95421	3.68168	3.64007	3.70669	4.31572	3.88807
		standard error	0.25731	0.20007	0.16086	0.18753	0.23216	0.18382
		UPPER 95%	3.28449	4.02864	3.93272	4.03796	4.74577	4.22179
		LOWER 95%	2.33546	3.25604	3.30737	3.31183	3.84388	3.50782
		x2	0.80205	4.48336	5.12749	1.57414	7.59847	5.73324
		m	2.55893	1.534	2.07322	1.63059	1.24608	1.5881
		standard error (m)	2.55893	1.534	2.07322	1.63059	1.24608	1.5881
		b	0.54141	0.2312	-1.26869	-0.16522	0.57919	-0.45435

## Sheet: Bb16
		STRAIN: Bb016
			cumulative mortality
		(conidia/ml)	Day 3	Day 4	Day 5	Day 6	Day 7		(conidia/ml)	Day 3	Day 4	Day 5	Day 6	Day 7
	R1	100000000	7	10	17	20	20	R4	100000000	4	11	18	20	20
		10000000	4	4	15	15	15		10000000	4	8	12	17	18
		1000000	1	2	5	5	5		1000000	2	5	5	5	7
		100000	0	1	1	1	2		100000	1	1	1	1	1
		10000	0	0	0	0	0		10000	0	0	0	0	0
		control	0	2	2	2	2		control	0	0	0	0	0
	R2	100000000	8	12	20	20	20	R5	100000000	7	8	16	20	20
		10000000	5	7	12	15	15		10000000	4	7	12	17	17
		1000000	1	1	5	7	7		1000000	4	4	4	4	4
		100000	0	0	1	2	2		100000	0	0	1	1	1
		10000	0	0	0	0	0		10000	0	0	0	0	0
		control	0	1	1	1	1		control	0	0	0	0	0
	R3	100000000	4	8	11	18	19	R6	100000000	6	8	11	18	20
		10000000	1	4	9	11	11		10000000	4	4	9	16	18
		1000000	1	1	5	7	8		1000000	4	4	5	8	8
		100000	0	2	2	3	3		100000	0	2	3	3	3
		10000	0	0	0	0	0		10000	0	0	0	0	0
		control	0	0	0	0	1		control	0	1	1	1	1
			CUMULATIVE MORTALITY (7th day)
		(conidia/ml)	R1	R2	R3	R4	R5	R6
		100000000	20	20	19	20	20	20
		10000000	15	15	11	18	17	18
		1000000	5	7	8	7	4	8
		100000	2	2	3	1	1	3
		10000	0	0	0	0	0	0
		control	2	1	1	0	0	1
			corrected mortality
		(conidia/ml)	R1	R2	R3	R4	R5	R6
		100000000	20	20	18.94	20	20	20
		10000000	14.44	14.73	10.52	18	17	17.8947
		1000000	3.33	6.31	7.36	7	4	7.36842
		100000	0	1.05	2.1	1	1	2.10526
		10000	0	0	0	0	0	0
		control	0	0	0	0	0	0
			R1	R2	R3	R4	R5	R6
		CL50	4.40955e+06	2.44516e+06	3.58326e+06	1.5483e+06	2.3874e+06	1.3556e+06
		standard error	1.41099e+06	894563	1.62183e+06	524938	812267	484597
		UPPER 95%	8.1817e+06	4.94628e+06	8.73996e+06	2.97232e+06	4.595e+06	2.69432e+06
		LOWER 95%	2.38221e+06	1.21496e+06	1.56715e+06	806162	1.24078e+06	682549
		x2	0.40061	0.67477	1.99952	0.33038	2.02911	1.22438
		m	1.74738	1.30027	0.91473	1.52818	1.51921	1.35934
		standard error (m)	0.34885	0.22693	0.15326	0.28446	0.28326	0.23969
		b	-6.61025	-3.30653	-0.99538	-4.4592	-4.6894	-3.33566
			R1	R2	R3	R4	R5	R6
		TL50	3.60684	3.36357	4.27031	3.73852	3.73791	4.74595
		standard error	0.22734	0.19345	0.23865	0.16975	0.21461	0.26588
		UPPER 95%	3.98395	3.68136	4.70805	4.04682	4.1075	5.27558
		LOWER 95%	3.1123	2.93864	3.78222	3.38718	3.28009	4.2359
		x2	3.14378	4.73722	2.62026	1.01784	6.33075	4.83188
		m	7.59166	9.40912	6.72328	10.3287	7.7268	6.24648
		standard error (m)	1.61498	1.93237	1.22608	1.84151	1.41087	1.1945
		b	0.77048	0.04327	0.76124	-0.91522	0.57541	0.77536

## Sheet: AVERAGE LC50
	STRAIN
	Ma002	PROBIT	R1	R2	R3	R4	R5	R6	AVERAGE
		CL50	2.44516e+06	3.93357e+06	2.72906e+06	2.17277e+06	4.23838e+06	3.7691e+06	3.21468e+06
		standard error	894563	1.70915e+06	1.13254e+06	863109	1.6551e+06	1.39657e+06	1.27517e+06
		UPPER	4.94628e+06	9.24458e+06	6.10818e+06	4.67524e+06	9.0628e+06	7.71672e+06	6.95896e+06
		LOWER	1.21496e+06	1.76876e+06	1.2539e+06	1.02367e+06	2.03371e+06	1.8631e+06	1.52635e+06
		x2	0.67477	1.35556	3.00631	1.59071	2.78479	1.86149	1.87894
		m	1.37496	0.93026	1.34615	1.08011	1.16492	1.27817	1.19576
		standard error (m)	0.24627	0.16565	0.24086	0.19527	0.20157	0.22486	0.212413
		b	-3.30653	-1.39666	-1.63989	-2.01172	-2.72019	-3.40557	-2.41343
	Ma003	PROBIT	R1	R2	R3	R4	R5	R6	AVERAGE
		CL50	1.51688e+06	5.18607e+06	2.41932e+06	1.87324e+06	1.39968e+06	1.5046e+06	2.31663e+06
		standard error	630040	2.45674e+06	1.22893e+06	741131	569538	529486	1.02598e+06
		UPPER	3.36863e+06	1.33996e+07	6.54313e+06	4.01259e+06	3.0554e+06	2.95987e+06	5.55654e+06
		LOWER	690622	2.22888e+06	964813	883710	645886	765400	1.02989e+06
		x2	3.86243	0.93413	2.10739	1.13947	1.60593	4.0626	2.28532
		m	1.01617	0.88235	0.76741	1.11178	1.05235	1.40626	1.03939
		standard error (m)	0.16469	0.15215	0.12943	0.18384	0.1711	0.25176	0.175495
		b	-1.28087	-0.92483	0.10106	-1.97375	-1.46775	-3.68706	-1.53887
	Ma004	PROBIT	R1	R2	R3	R4	R5	R6	AVERAGE
		CL50	6.7693e+06	1.55507e+07	1.6247e+07	8.49514e+06	9.23216e+06	1.95001e+07	1.26324e+07
		standard error	3.21668e+06	9.26399e+06	6.14955e+06	4.75161e+06	5.06012e+06	1.50182e+07	7.24336e+06
		UPPER	1.77102e+07	5.58765e+07	3.4792e+07	2.71862e+07	2.89166e+07	1.05041e+08	4.49204e+07
		LOWER	2.93064e+06	6.09657e+06	8.15778e+06	3.35628e+06	3.71014e+06	6.51627e+06	5.12795e+06
		x2	0.17854	0.38333	0.04823	1.08902	1.2207	1.75055	0.778395
		m	0.90002	0.78337	1.34916	0.76505	0.79004	0.64391	0.871925
		standard error (m)	0.15868	0.15231	0.26979	0.14009	0.14509	0.13214	0.16635
		b	-1.14765	-0.6338	-4.72851	-0.30119	-0.50284	0.30584	-1.16802
	Ma005	PROBIT	R1	R2	R3	R4	R5	R6	AVERAGE
		CL50	1.39765e+06	2.00857e+06	3.74846e+06	471743	938547	3.22624e+06	1.9652e+06
		standard error	603035	772937	1.34056e+06	224048	402148	1.47228e+06	802501
		UPPER	3.19713e+06	4.21371e+06	7.47487e+06	1.13153e+06	2.12025e+06	7.91019e+06	4.34128e+06
		LOWER	618429	965417	1.89255e+06	187408	414558	1.3996e+06	912993
		x2	2.90758	2.34248	2.64409	0.9625	1.92601	2.52277	2.21757
		m	0.95216	1.17199	1.37131	0.83365	0.9613	0.89881	1.03154
		standard error (m)	0.1534	0.19663	0.24679	0.13735	0.15453	0.14975	0.173075
		b	-0.85137	-2.38692	-4.01481	0.27009	-0.74134	-0.85009	-1.42907
	Ma014	PROBIT	R1	R2	R3	R4	R5	R6	AVERAGE
		CL50	2.93722e+07	1.27137e+08	6.54544e+07	1.77136e+07	5.48293e+07	2.15322e+07	5.26732e+07
		standard error	3.04597e+07	2.08222e+08	5.60242e+07	1.40854e+07	4.83538e+07	1.19298e+07	6.15124e+07
		UPPER	2.84917e+08	4.12912e+09	4.80975e+08	1.00086e+08	4.1266e+08	7.17005e+07	9.13242e+08
		LOWER	8.12976e+06	2.85597e+07	2.2986e+07	5.74749e+06	1.82625e+07	9.01365e+06	1.54499e+07
		x2	3.66116	0.50903	0.50569	0.72185	1.10112	0.70985	1.20145
		m	0.54991	0.57488	0.80548	0.61618	0.73323	0.8954	0.695847
		standard error (m)	0.12256	0.14766	0.19411	0.12686	0.16934	0.18175	0.157047
		b	0.89333	0.34101	-1.29558	0.53373	-0.67451	-1.56604	-0.294677
	Ma034	PROBIT	R1	R2	R3	R4	R5	R6	AVERAGE
		CL50	492471	2.19265e+06	3.76045e+06	870306	1.17346e+06	1.87967e+06	1.72817e+06
		standard error	218702	956167	1.5639e+06	334387	530273	685687	714853
		UPPER	1.12753e+06	5.10571e+06	8.47865e+06	1.81485e+06	2.77855e+06	3.7909e+06	3.84937e+06
		LOWER	208432	971359	1.73494e+06	416721	499508	934797	794292
		x2	0.77903	3.88727	3.9707	1.5999	1.51199	2.56612	2.38583
		m	0.91755	0.94593	1.04243	1.17034	0.88426	1.30448	1.04417
		standard error (m)	0.14942	0.15439	0.17603	0.19473	0.14262	0.22684	0.174005
		b	-0.22304	-0.99813	-1.85421	-1.95141	-0.36697	-3.18444	-1.4297
	Bb016	PROBIT	R1	R2	R3	R4	R5	R6	AVERAGE
		CL50	4.40955e+06	2.44516e+06	3.58326e+06	1.5483e+06	2.3874e+06	1.3556e+06	2.62155e+06
		standard error	1.41099e+06	894563	1.62183e+06	524938	812267	484597	958198
		UPPER	8.1817e+06	4.94628e+06	8.73996e+06	2.97232e+06	4.595e+06	2.69432e+06	5.35493e+06
		LOWER	2.38221e+06	1.21496e+06	1.56715e+06	806162	1.24078e+06	682549	1.31564e+06
		x2	0.40061	0.67477	1.99952	0.33038	2.02911	1.22438	1.1098
		m	1.74738	1.30027	0.91473	1.52818	1.51921	1.35934	1.39485
		standard error (m)	0.34885	0.22693	0.15326	0.28446	0.28326	0.23969	0.256075
		b	-6.61025	-3.30653	-0.99538	-4.4592	-4.6894	-3.33566	-3.8994

## Sheet: AVERAGE LT50
	STRAIN
	Ma002	PROBIT	R1	R2	R3	R4	R5	R6	AVERAGE
		TL50	3.56539	3.82085	4.01466	3.93348	4.07287	4.15246	3.92662
		standard error	0.16853	0.32532	0.17737	0.16743	0.23191	0.17467	0.207538
		UPPER	3.86472	4.33612	4.34282	4.24428	4.48657	4.47961	4.29235
		LOWER	3.21128	3.1069	3.65244	3.59222	3.58948	3.79882	3.49186
		x2	0.99151	1.359	2.39324	1.59081	5.00109	4.61549	2.65852
		m	10.5521	5.07595	9.78859	10.6288	6.93245	10.1823	8.86003
		standard error (m)	2.00212	1.12662	1.63912	1.81108	1.25751	1.67608	1.58542
		b	-0.82589	2.04498	-0.90887	-1.32175	0.7719	-1.29577	-0.2559
	Ma003	PROBIT	R1	R2	R3	R4	R5	R6	AVERAGE
		TL50	2.90732	3.43951	4.35127	4.69836	3.52742	4.71159	3.93925
		standard error	0.32523	0.20766	0.23115	0.23097	0.26565	0.16746	0.23802
		UPPER	3.30264	3.78138	4.78194	5.1505	3.94813	5.03028	4.33248
		LOWER	2.13212	2.98489	3.88338	4.24809	2.93969	4.37621	3.4274
		x2	3.0005	1.09933	1.09442	1.51178	1.80796	1.4567	1.66178
		m	7.67702	8.48398	7.01499	7.34456	6.44486	12.3785	8.22399
		standard error (m)	2.09752	1.67272	1.25036	1.29159	1.30561	2.08355	1.61689
		b	1.44175	0.44837	0.52011	0.06485	1.47172	-3.33283	0.102328
	Ma004	PROBIT	R1	R2	R3	R4	R5	R6	AVERAGE
		TL50	4.01622	4.37102	4.75561	5.51543	4.35426	5.27789	4.71507
		standard error	0.36439	0.33217	0.22709	0.36521	0.28672	0.63422	0.3683
		UPPER	4.60268	4.9736	5.20271	6.38802	4.87945	6.99333	5.50663
		LOWER	3.22671	3.69335	4.31486	4.92855	3.77008	4.3712	4.05079
		x2	2.75128	3.30649	1.23269	5.24427	2.43583	2.30291	2.87891
		m	4.49579	4.78812	7.59276	5.61412	5.52314	3.3303	5.22404
		standard error (m)	1.07901	1.08785	1.3221	1.21241	1.13246	1.03669	1.14509
		b	2.28536	1.93281	-0.14186	0.83669	1.47119	2.59399	1.49636
	Ma005	PROBIT	R1	R2	R3	R4	R5	R6	AVERAGE
		TL50	3.09706	3.29108	3.72166	4.08324	3.70024	4.19853	3.68197
		standard error	0.23134	0.211	0.17113	0.18323	0.15285	0.19641	0.190993
		UPPER	3.43052	3.62455	4.03121	4.42256	3.98414	4.56296	4.00932
		LOWER	2.56042	2.81956	3.36652	3.70942	3.38867	3.79869	3.27388
		x2	2.19964	5.46887	4.42282	5.94713	4.27691	5.9706	4.71433
		m	9.01861	8.81024	10.2169	9.37603	12.081	8.56908	9.67865
		standard error (m)	2.14643	1.86255	1.82935	1.55842	2.22255	1.4292	1.84142
		b	0.57232	0.44213	-0.83116	-0.7288	-1.86479	-0.33937	-0.458278
	Ma014	PROBIT	R1	R2	R3	R4	R5	R6	AVERAGE
		TL50	5.92453	6.49346	6.03287	5.49675	6.63999	6.06432	6.10865
		standard error	0.44811	0.52683	0.43339	0.32754	0.42376	0.32825	0.414647
		UPPER	7.09802	7.98203	7.16563	6.25626	7.8118	6.86896	7.19712
		LOWER	5.27828	5.80953	5.40829	4.95372	6.08383	5.55629	5.51499
		x2	3.30878	1.53276	2.55753	2.82891	1.26123	3.30058	2.46496
		m	5.50865	6.30128	5.96209	6.19778	8.81034	7.94649	6.78777
		standard error (m)	1.25656	1.49486	1.33368	1.27083	2.14753	1.67791	1.53023
		b	0.74372	-0.11964	0.34645	0.41298	-2.24358	-1.22037	-0.34674
	Ma34	PROBIT	R1	R2	R3	R4	R5	R6	AVERAGE
		TL50	2.95421	3.68168	3.64007	3.70669	4.31572	3.88807	3.69774
		standard error	0.25731	0.20007	0.16086	0.18753	0.23216	0.18382	0.203625
		UPPER	3.28449	4.02864	3.93272	4.03796	4.74577	4.22179	4.0419
		LOWER	2.33546	3.25604	3.30737	3.31183	3.84388	3.50782	3.2604
		x2	0.80205	4.48336	5.12749	1.57414	7.59847	5.73324	4.21979
		m	9.47747	8.42476	11.1719	9.07793	6.96132	9.24882	9.06037
		standard error (m)	2.55893	1.534	2.07322	1.63059	1.24608	1.5881	1.77182
		b	0.54141	0.2312	-1.26869	-0.16522	0.57919	-0.45435	-0.08941
	Bb016	PROBIT	R1	R2	R3	R4	R5	R6	AVERAGE
		TL50	3.60684	3.36357	4.27031	3.73852	3.73791	4.74595	3.91052
		standard error	0.22734	0.19345	0.23865	0.16975	0.21461	0.26588	0.21828
		UPPER	3.98395	3.68136	4.70805	4.04682	4.1075	5.27558	4.30054
		LOWER	3.1123	2.93864	3.78222	3.38718	3.28009	4.2359	3.45606
		x2	3.14378	4.73722	2.62026	1.01784	6.33075	4.83188	3.78029
		m	7.59166	9.40912	6.72328	10.3287	7.7268	6.24648	8.00433
		standard error (m)	1.61498	1.93237	1.22608	1.84151	1.41087	1.1945	1.53672
		b	0.77048	0.04327	0.76124	-0.91522	0.57541	0.77536	0.33509
