# Supplementary material for: High susceptibility of Tetranychus merganser (Acari: Tetranychidae), an emergent pest of the tropical crop Carica papaya, towards Metarhizium anisopliae s.l. and Beauveria bassiana strains
Source: PeerJ. 2022 Oct 24;10:e14064. doi: 10.7717/peerj.14064 (PMC9610662; doi:10.7717/peerj.14064)
Supplement: Supplemental Information 3 [file peerj-10-14064-s003.xlsx]

## Sheet: Eggs infectivity
		Infectivity on eggs (Figure 2)
R: Independent experiment
																								ANOVA & TUKEY
	R1	STRAIN	EGGS (N)	INFECTED	%			INFECTIVITY (%)
		Control	20	0	0		STRAIN	R1	R2	R3	AVERAGE	S.D.				ARC SIN transformation
		Ma002	20	5	25		Control	15	20	15	16.6667	2.88675
		Ma003	20	8	40		Ma002	25	10	15	16.6667	7.63763				Treatment	Repetition	dead mites	% mortality	proportion	square root	arcsen
		Ma014	20	17	85		Ma003	40	15	5	20	18.0278				control	1	0	0	0	0	0
		Ma034	20	19	95		Ma014	85	65	65	71.6667	11.547				control	2	0	0	0	0	0
		Bb016	20	4	20		Ma034	95	70	80	81.6667	12.5831				control	3	0	0	0	0	0
		Bb017	20	4	20		Bb016	20	0	25	15	13.2288				Ma02	1	5	25	0.25	0.5	0.523599
							Bb017	20	0	15	11.6667	10.4083				Ma02	2	2	10	0.1	0.316228	0.321751
																Ma02	3	3	15	0.15	0.387298	0.397699
	R2	STRAIN	EGGS (N)	INFECTED	%											Ma03	1	8	40	0.4	0.632456	0.684719
		Control	20	0	0											Ma03	2	3	15	0.15	0.387298	0.397699
		Ma002	20	2	10											Ma03	3	1	5	0.05	0.223607	0.225513
		Ma003	20	3	15											Ma14	1	17	85	0.85	0.921954	1.1731
		Ma014	20	13	65											Ma14	2	13	65	0.65	0.806226	0.937744
		Ma034	20	14	70											Ma14	3	17	85	0.85	0.921954	1.1731
		Bb016	20	0	0											Ma34	1	19	95	0.95	0.974679	1.34528
		Bb017	20	0	0											Ma34	2	14	70	0.7	0.83666	0.991157
																Ma34	3	16	80	0.8	0.894427	1.10715
																Bb16	1	4	20	0.2	0.447214	0.463648
	R3	STRAIN	EGGS (N)	INFECTED	%											Bb16	2	0	0	0	0	0
		Control	20	0	0											Bb16	3	5	25	0.25	0.5	0.523599
		Ma002	20	3	15											Bb17	1	4	20	0.2	0.447214	0.463648
		Ma003	20	1	5											Bb17	2	0	0	0	0	0
		Ma014	20	13	65											Bb17	3	3	15	0.15	0.387298	0.397699
		Ma034	20	16	80
		Bb016	20	5	25
		Bb017	20	3	15
											F=14.83 p=0.0001
